# Supplementary material for: Indoor and Outdoor Cultures of Gracilaria chilensis: Determination of Biomass Growth and Molecular Markers for Biomass Quality Evaluation
Source: MDPI journal article supplement (doi:10.3390/plants12061340), 2023-03-16
Supplement: s1 [file s1]

Supplementary Material

# Indoor and Outdoor Cultures of *Gracilaria chilensis*: Determination of Biomass Growth and Molecular Markers for Biomass Quality Evaluation

Sofía Caroca–Valencia<sup>1,2,3,4</sup>, Jorge Rivas<sup>1,2,3,4</sup>, Matías Araya<sup>1,2,3,4</sup>, Alejandra Núñez<sup>1,2,3,4</sup>, Florentina Piña<sup>1,2,3,4,5</sup>, Fernanda Toro-Mellado<sup>1,2,3,4,5</sup> and Loretto Contreras–Porcia<sup>1,2,3,4,\*</sup>

<sup>1</sup> Departamento de Ecología y Biodiversidad, Facultad de Ciencias de la Vida, Universidad Andres Bello, Santiago 8370251, Chile

<sup>2</sup> Centro de Investigación Marina Quintay (CIMARQ), Facultad de Ciencias de la Vida, Universidad Andres Bello, Quintay, Valparaíso 2531015, Chile

<sup>3</sup> Center of Applied Ecology and Sustainability (CAPES), Santiago 8331150, Chile

<sup>4</sup> Instituto Milenio en Socio–Ecología Costera (SECOS), Santiago 8370251, Chile

<sup>5</sup> Programa de Doctorado en Biotecnología, Facultad de Ciencias de la Vida, Universidad Andres Bello, Santiago, Chile

\* Correspondence: loretocontreras@unab.cl

**Table S1.** Physicochemical parameters (pH, oxidation–reduction potential (ORP, mV), dissolved oxygen (DO, mg L<sup>−1</sup>), conductivity (mS cm<sup>−1</sup>), salinity (PSU), turbidity (FNU), and temperature (°C)) recorded during the cultivation of *G. chilensis* under the different treatments in both types of systems (indoor and outdoor cultivation).

| Treatment       | Week | pH | ORP | DO  | mS cm <sup>−1</sup> | PSU | FNU | °C |
|-----------------|------|----|-----|-----|---------------------|-----|-----|----|
| SW indoor       | 1    | 8  | 196 | 88  | 43                  | 28  | 5   | 13 |
|                 | 2    | 8  | 193 | 87  | 42                  | 27  | 6   | 13 |
|                 | 3    | 8  | 207 | 95  | 42                  | 27  | 1   | 13 |
| VS/BF indoor    | 1    | 8  | 195 | 95  | 43                  | 28  | 22  | 13 |
|                 | 2    | 8  | 185 | 91  | 42                  | 27  | 4   | 12 |
|                 | 3    | 8  | 215 | 94  | 42                  | 27  | 23  | 14 |
| BF 0.05% indoor | 1    | 8  | 206 | 85  | 45                  | 29  | 1   | 14 |
|                 | 2    | 8  | 187 | 87  | 45                  | 29  | 1   | 15 |
|                 | 3    | 8  | 172 | 95  | 43                  | 27  | 0   | 13 |
| BF 0.1% indoor  | 1    | 8  | 221 | 89  | 39                  | 25  | 1   | 15 |
|                 | 2    | 8  | 163 | 84  | 40                  | 26  | 6   | 12 |
|                 | 3    | 8  | 216 | 79  | 40                  | 26  | 4   | 12 |
| BF 0.5% indoor  | 1    | 8  | 191 | 56  | 39                  | 25  | 5   | 13 |
|                 | 2    | 8  | 185 | 72  | 39                  | 25  | 6   | 14 |
|                 | 3    | 8  | 190 | 98  | 42                  | 27  | 41  | 13 |
| BF 1% indoor    | 1    | 8  | 177 | 100 | 39                  | 25  | 49  | 13 |
|                 | 2    | 8  | 204 | 106 | 38                  | 24  | 14  | 11 |
|                 | 3    | 8  | 217 | 103 | 39                  | 25  | 28  | 14 |
| SW outdoor      | 1    | 8  | 196 | 88  | 43                  | 28  | 5   | 13 |
|                 | 2    | 8  | 193 | 87  | 42                  | 27  | 6   | 13 |

|                             |          |   |     |     |    |    |   |    |
|-----------------------------|----------|---|-----|-----|----|----|---|----|
|                             | <b>3</b> | 8 | 207 | 95  | 42 | 27 | 1 | 13 |
| <b>VS/BF<br/>outdoor</b>    | <b>1</b> | 8 | 214 | 81  | 39 | 25 | 2 | 15 |
|                             | <b>2</b> | 8 | 179 | 86  | 41 | 26 | 0 | 12 |
|                             | <b>3</b> | 8 | 120 | 90  | 47 | 30 | 1 | 15 |
|                             |          |   |     |     |    |    |   |    |
| <b>BF 0.05%<br/>outdoor</b> | <b>1</b> | 9 | 192 | 89  | 45 | 29 | 6 | 13 |
|                             | <b>2</b> | 8 | 176 | 88  | 45 | 29 | 1 | 14 |
|                             | <b>3</b> | 8 | 164 | 94  | 42 | 27 | 1 | 13 |
|                             |          |   |     |     |    |    |   |    |
| <b>BF 0.1%<br/>outdoor</b>  | <b>1</b> | 8 | 182 | 87  | 40 | 26 | 8 | 12 |
|                             | <b>2</b> | 8 | 213 | 84  | 39 | 25 | 2 | 15 |
|                             | <b>3</b> | 8 | 173 | 80  | 39 | 25 | 1 | 12 |
|                             |          |   |     |     |    |    |   |    |
| <b>BF 0.5%<br/>outdoor</b>  | <b>1</b> | 8 | 215 | 86  | 41 | 26 | 1 | 14 |
|                             | <b>2</b> | 8 | 170 | 90  | 42 | 27 | 9 | 14 |
|                             | <b>3</b> | 8 | 177 | 100 | 33 | 21 | 1 | 14 |
|                             |          |   |     |     |    |    |   |    |
| <b>BF 1%<br/>outdoor</b>    | <b>1</b> | 8 | 218 | 85  | 47 | 28 | 0 | 15 |
|                             | <b>2</b> | 8 | 175 | 93  | 44 | 27 | 2 | 12 |
|                             | <b>3</b> | 8 | 136 | 90  | 39 | 29 | 1 | 12 |
|                             |          |   |     |     |    |    |   |    |
